# Supplementary material for: Design, synthesis, and anti-hepatocellular carcinoma of thiopyrimidine/chalcone hybrids as dual STAT3/STAT5 inhibitors
Source: Royal Society of Chemistry journal article supplement (doi:10.1039/d3md00300k), 2023-01-01
Supplement: d3md00300k1.pdf [file d3md00300k1.pdf]

## Supplementary Material

### **Design, synthesis, and anti-hepatocellular carcinoma of thiopyrimidine/chalcone hybrids as dual STAT3/STAT5 inhibitors**

**Najla Altwaijry<sup>1</sup>, Rehab Sabour<sup>2</sup>, Mona H. Ibrahim<sup>2</sup>, Omkulthom Al kamaly<sup>1</sup>, Omeima Abdullah<sup>3</sup>, Marwa F. Harras<sup>2\*</sup>**

<sup>1</sup>*Department of Pharmaceutical Sciences, College of pharmacy, Princess Nourah bint Abdulrahman University, Riyadh, Saudi Arabia, P.O. Box 84428, Riyadh 11671, Saudi Arabia*

<sup>2</sup>*Department of Pharmaceutical Medicinal Chemistry and Drug Design, Faculty of Pharmacy (Girls), Al-Azhar University, Cairo, Egypt*

<sup>3</sup>*Pharmaceutical chemistry department, College of pharmacy, Umm Al-Qura University, Makkah, Saudi Arabia*

### Table of contents

|                                                                                         |              |
|-----------------------------------------------------------------------------------------|--------------|
| <b>1- Chemistry Materials</b>                                                           | <b>2</b>     |
| <b>2- NMR Spectra</b>                                                                   | <b>3-10</b>  |
| <b>3- Biological assays</b>                                                             |              |
| <b>3.1. <i>In vitro</i> cytotoxicity</b>                                                | <b>11</b>    |
| <b>3.2. Cytotoxicity IC<sub>50</sub> curves</b>                                         | <b>11-13</b> |
| <b>3.3. STAT3/5 assay</b>                                                               | <b>14-16</b> |
| <b>3.4. Western blot analysis</b>                                                       | <b>17-18</b> |
| <b>4- Binding poses of potent STAT3 and STAT5 inhibitors inside SH2 binding domains</b> | <b>19</b>    |

## 1- Chemistry Materials

Reagents and solvents were bought from standard commercial sources and used without any extra purification. The reported yields are for products that have been cleaned. Thin-layer chromatography (TLC) on 0.25 mm thick Merck Silica Gel 60 F254 was used to check all reactions regularly and a UV lamp was used to see what was happening. The Stuart SMP3 device was used to measure the melting points of open capillary tubes. IR spectra were measured with a Shimadzu FT/IR 1650 (Perkin Elmer) spectrometer (KBr). The  $^1\text{H}$  and  $^{13}\text{C}$  NMR spectra were recorded in DMSO- $d_6$  using a Brüker Advance-400 instrument (400 MHz for  $^1\text{H}$  and 100 MHz for  $^{13}\text{C}$ ) (400 MHz for  $^1\text{H}$  and 100 MHz for  $^{13}\text{C}$ ). Chemical shifts ( $\delta$ ) are given in parts per million (ppm) relative to TMS as an internal standard or to the solvent in which the spectrum was recorded. At the Regional Center for Mycology and Biotechnology (RCMB), Al-Azhar University, Nasr City, Cairo, a mass spectrum was done on a direct inlet part to mass analyzer in a Thermo Scientific GCMS model ISQ. Mass spectroscopy was done using the Electron Impact mode. We used a PerkinElmer 240 elemental analyzer to look at the C, H, and N elements in each derived congener.

## 2. NMR Spectra

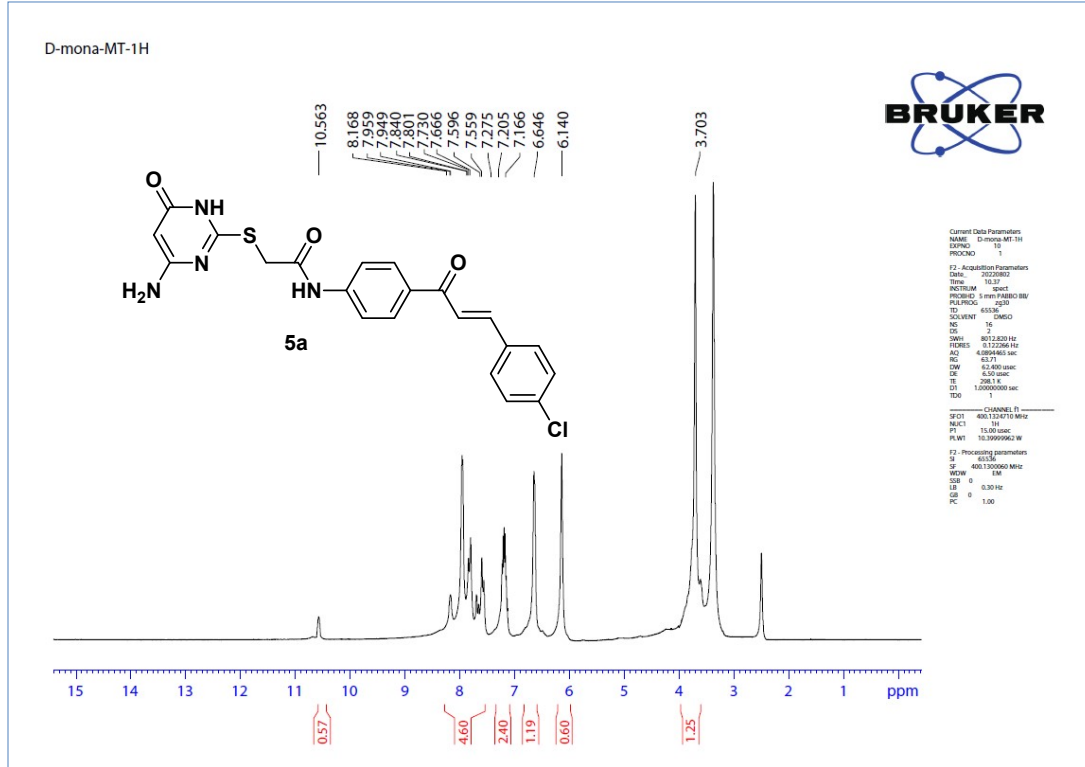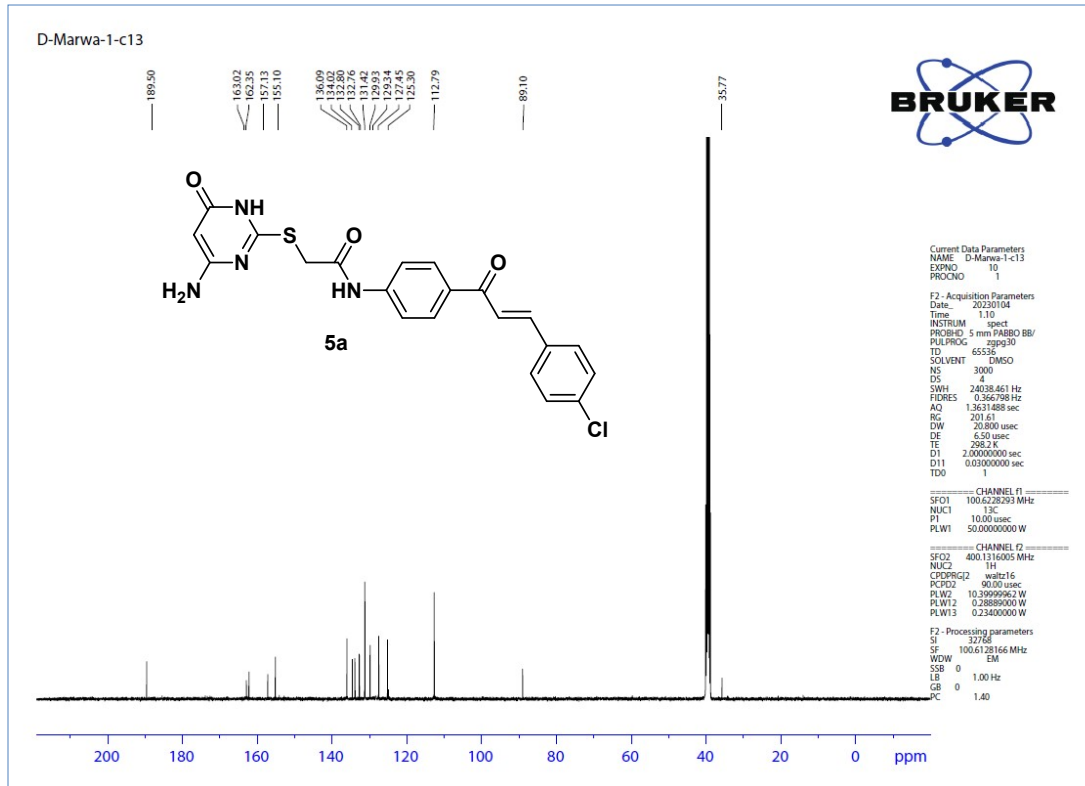

D-marwa-2-1H

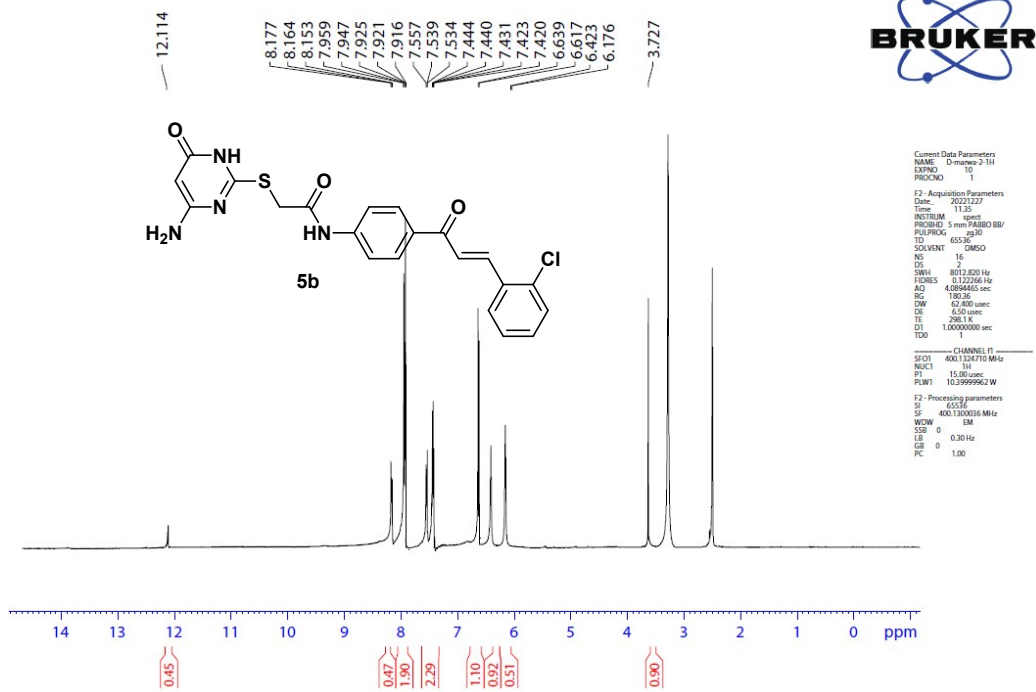

D-Marwa-2-c13

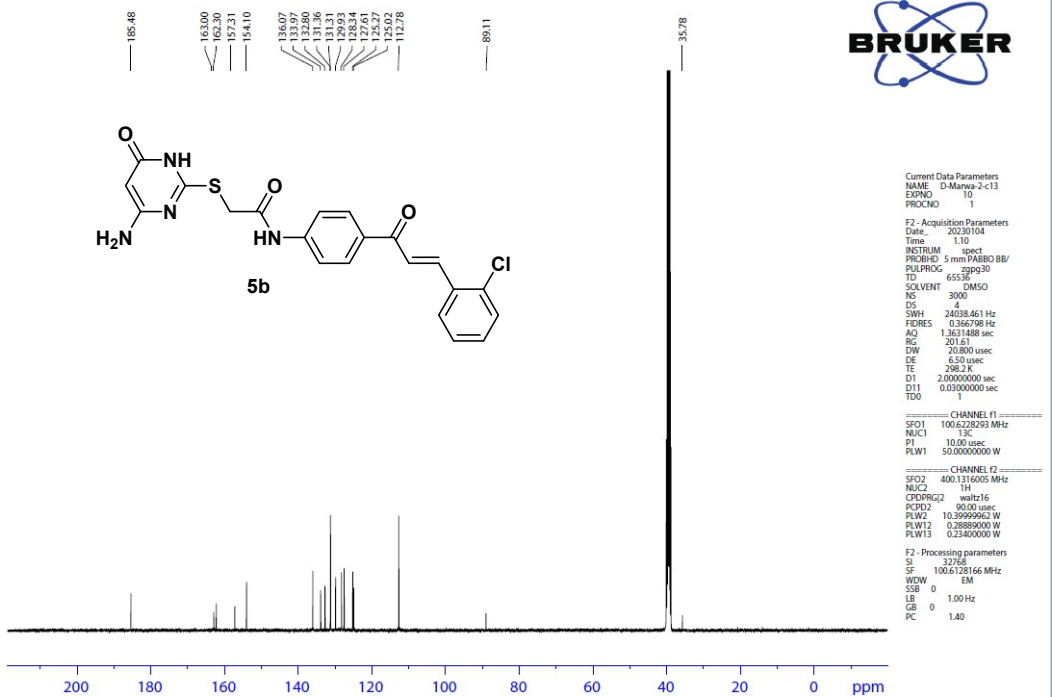

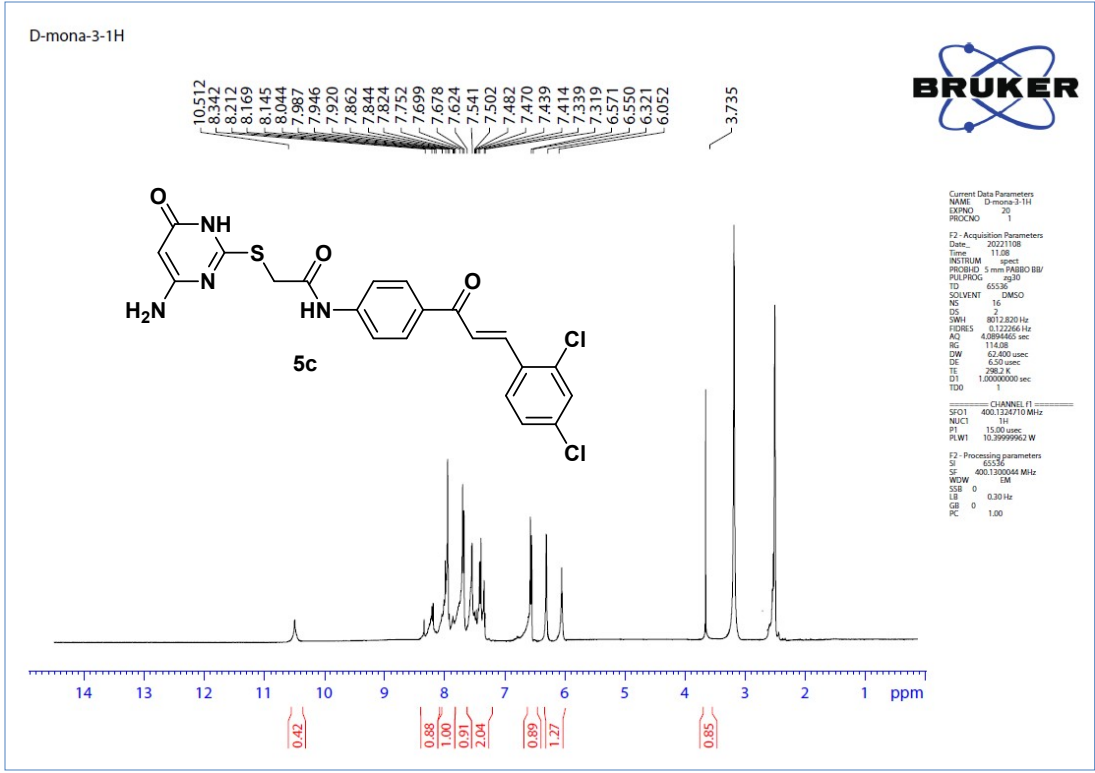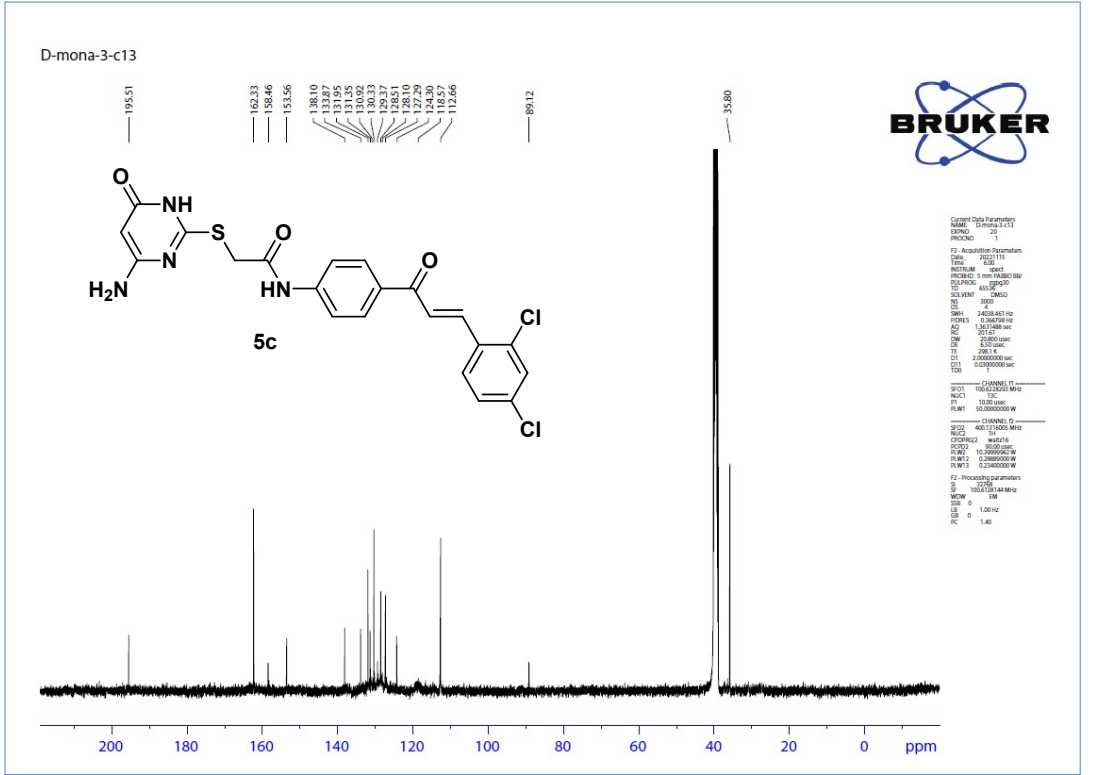

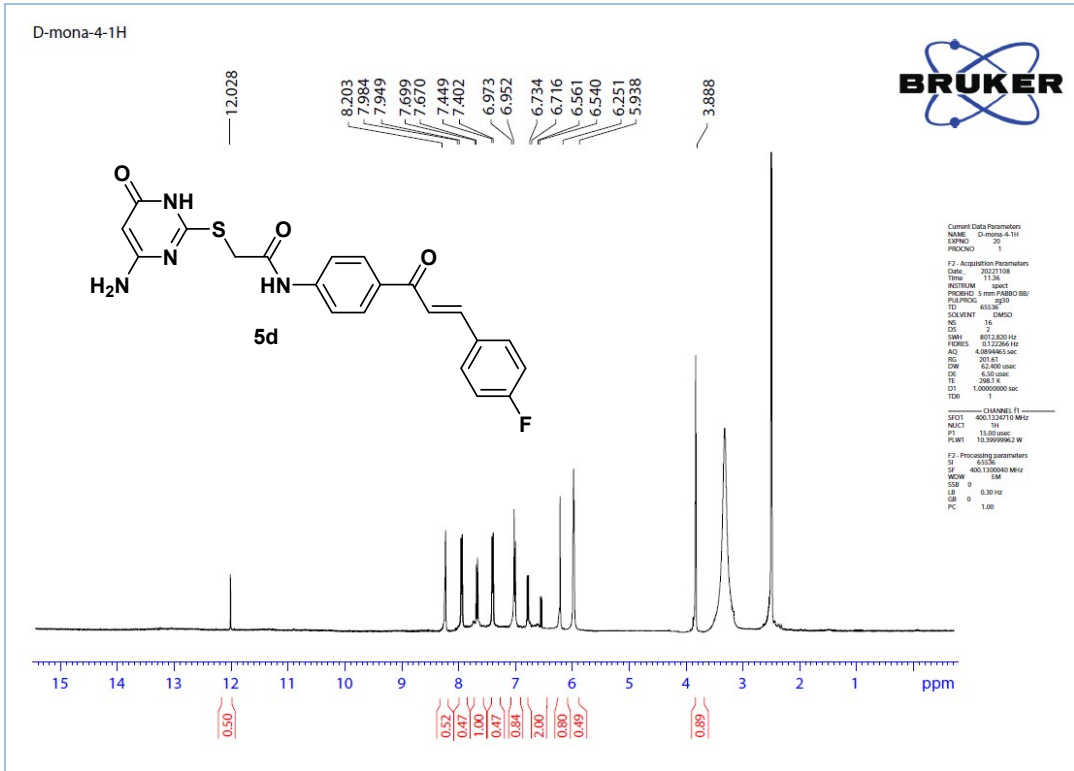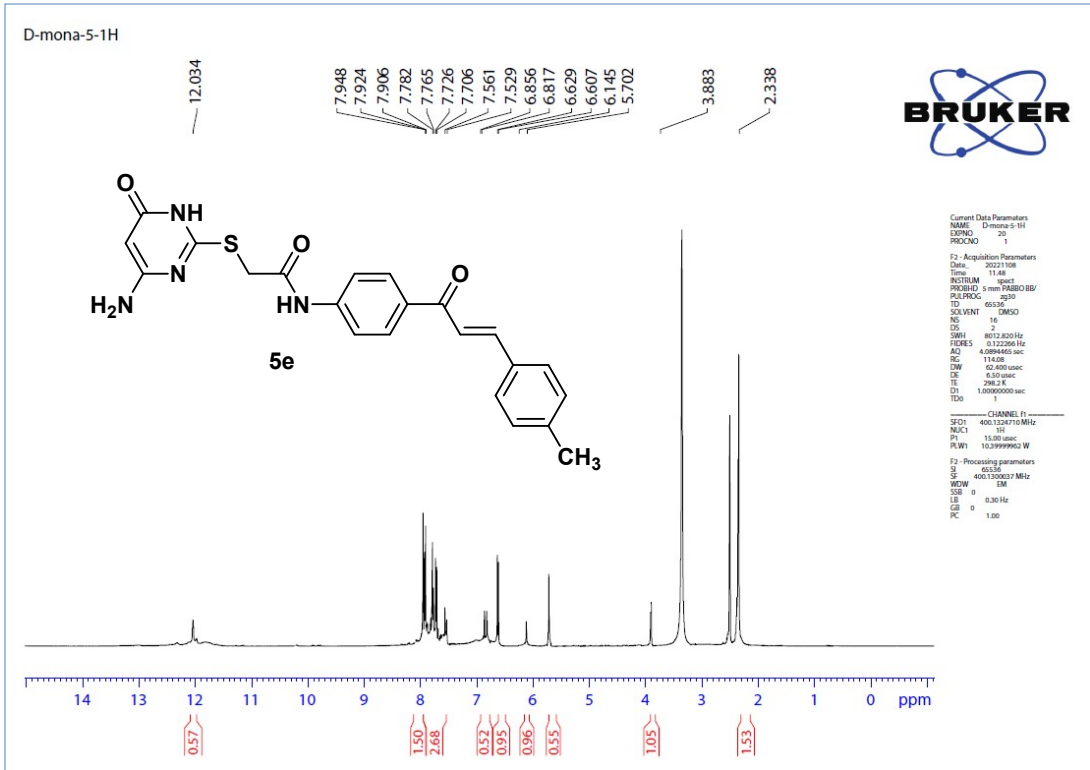

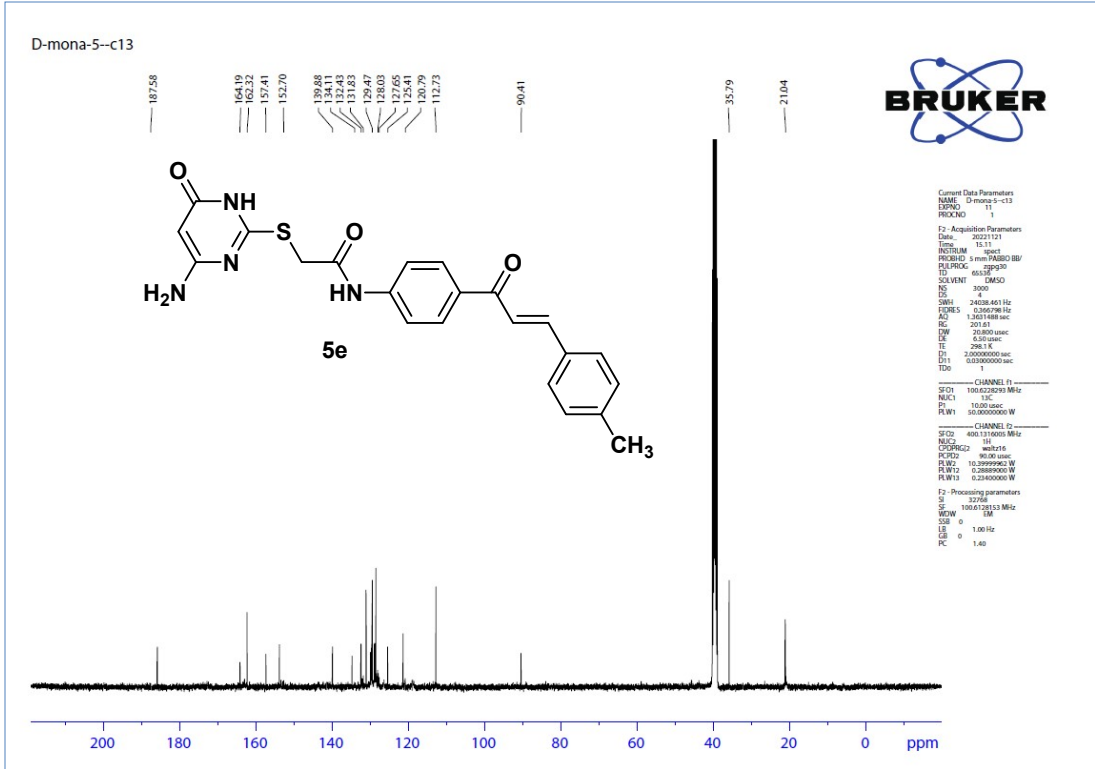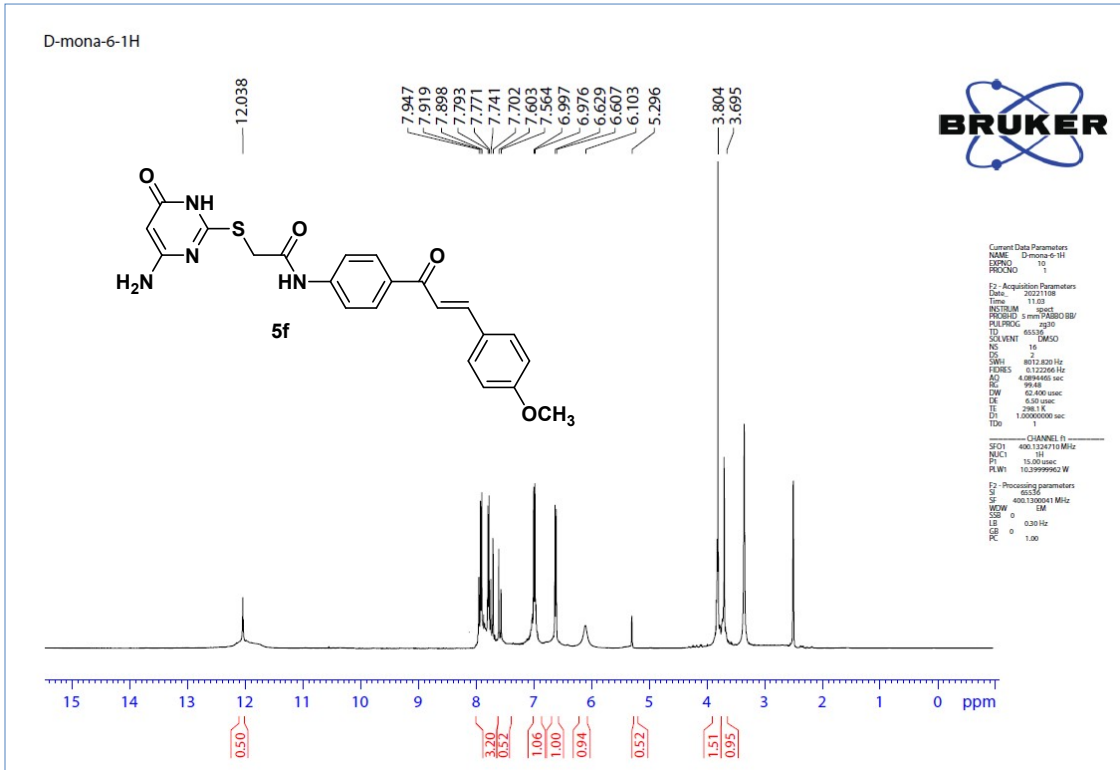

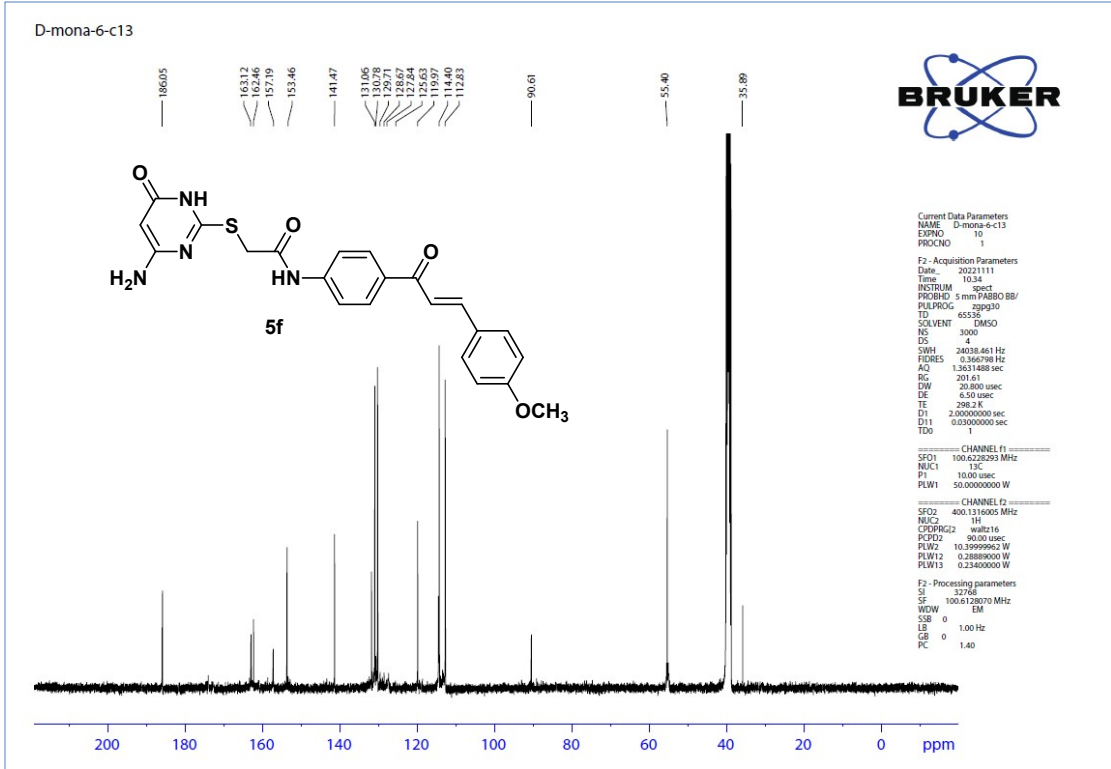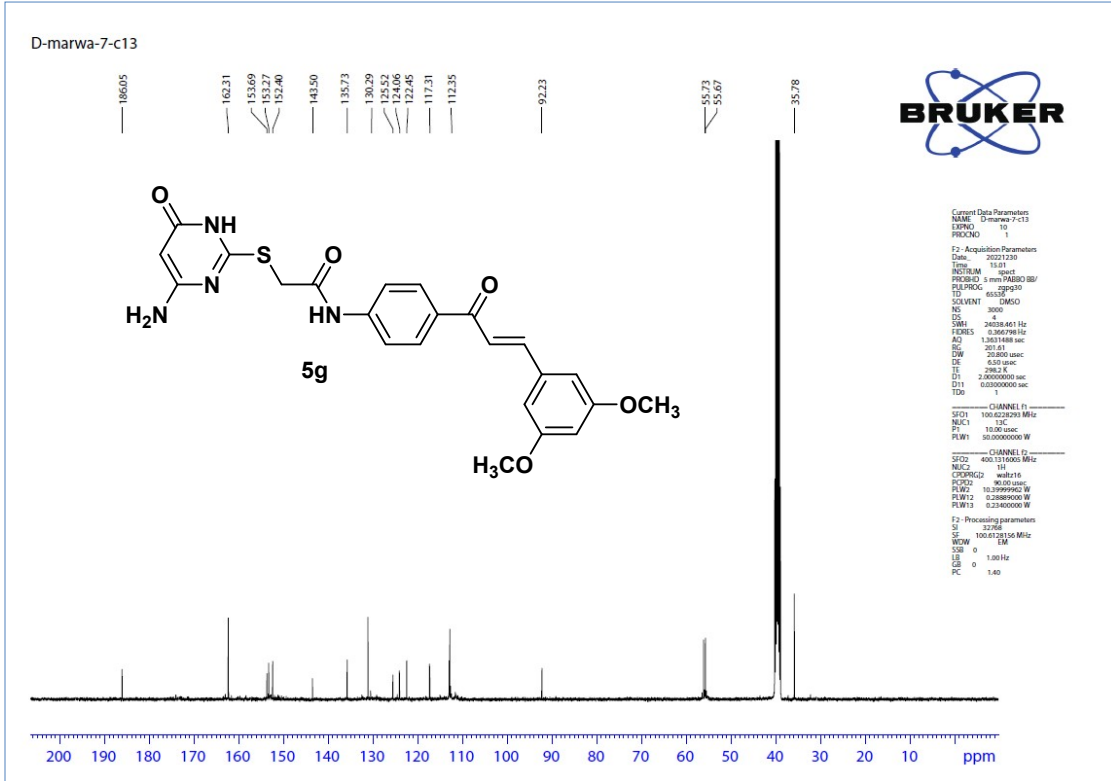



D-mona-8-1H

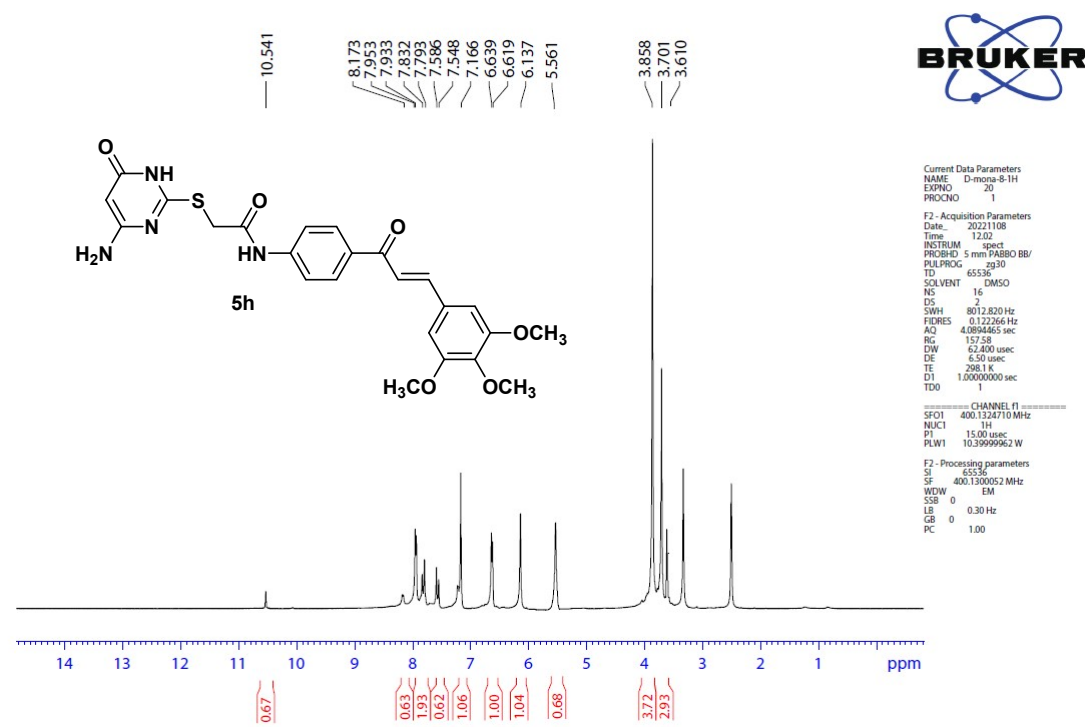

D-mona-8-c13

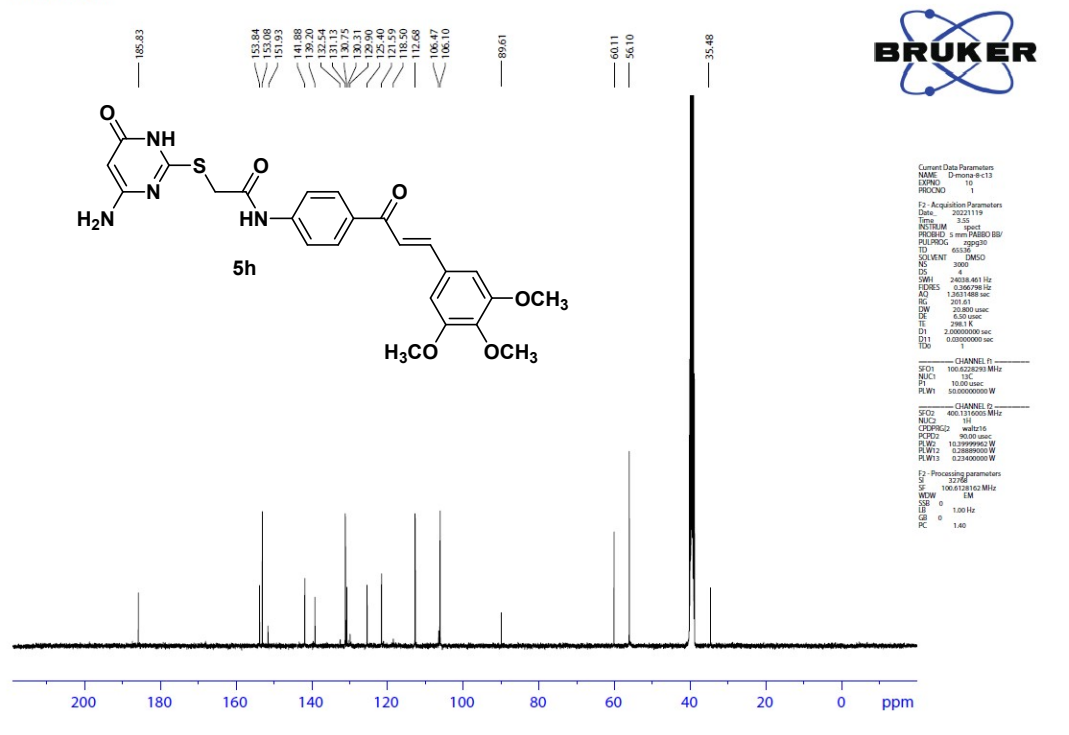

D-mona-9-1H

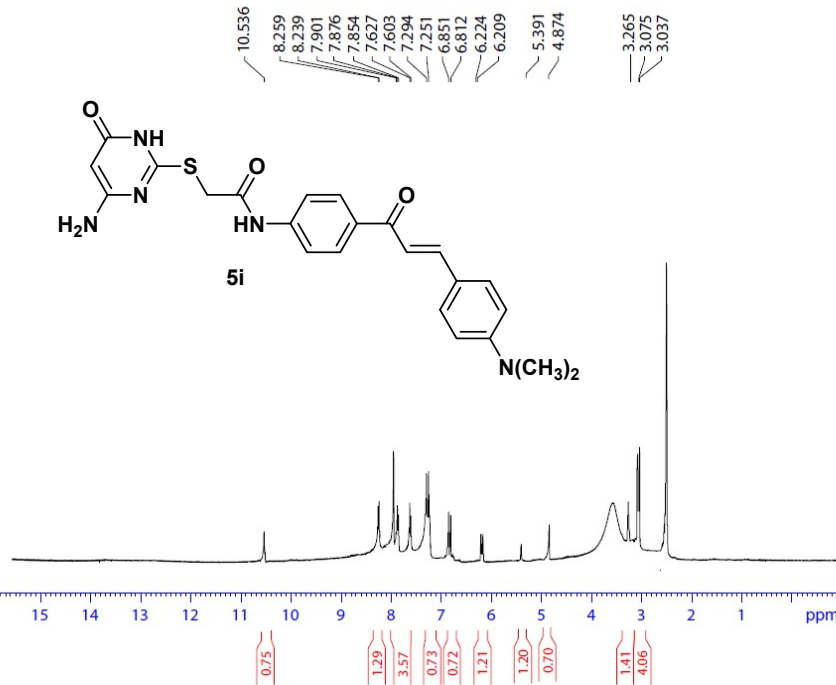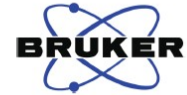

Current Data Parameters  
NAME D-mona-9-1H  
EXPNO 10  
PROCNO 1  
F2 - Acquisition Parameters  
Date\_ 20221109  
Time 10:47  
INSTRUM spect  
PROBHD 5 mm F4BBO BB/  
PULPROG zg30  
TD 65536  
SOLVENT DMSO  
NS 16  
DS 2  
SWH 8012.820 Hz  
FIDRES 0.122266 Hz  
AQ 4.0894465 sec  
RG 157.58  
DW 62.400 usec  
DE 6.50 usec  
TE 298.1 K  
D1 1.0000000 sec  
TDO 1

===== CHANNEL f1 =====  
SFO1 400.1324710 MHz  
NUC1 1H  
P1 15.00 usec  
PLW1 10.3999962 W  
F2 - Processing parameters  
SI 65536  
SF 400.130036 MHz  
WDW EM  
SSB 0  
LB 0.30 Hz  
GB 0  
PC 1.00

D-mona-9-c13

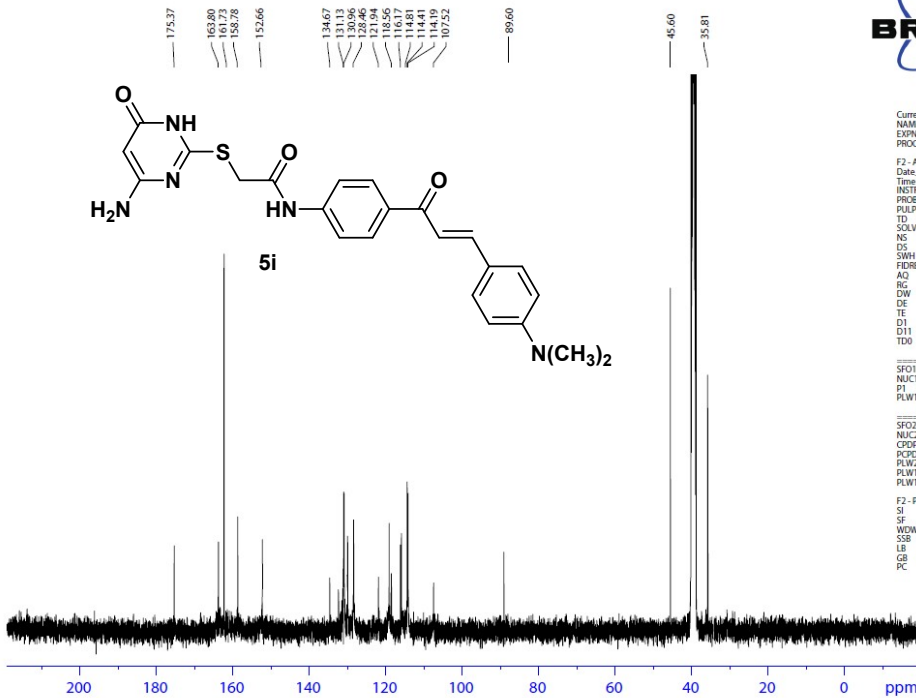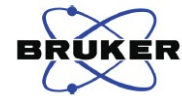

Current Data Parameters  
NAME D-mona-9-c13  
EXPNO 10  
PROCNO 1  
F2 - Acquisition Parameters  
Date\_ 20221119  
Time 6:49  
INSTRUM spect  
PROBHD 5 mm F4BBO BB/  
PULPROG zgpg30  
TD 65536  
SOLVENT DMSO  
NS 3000  
DS 4  
SWH 24038.461 Hz  
FIDRES 0.360798 Hz  
AQ 1.3631488 sec  
RG 201.61  
DW 20.800 usec  
DE 6.50 usec  
TE 298.1 K  
D1 2.0000000 sec  
D11 0.0300000 sec  
TDO 1

===== CHANNEL f1 =====  
SFO1 100.628293 MHz  
NUC1 13C  
P1 10.00 usec  
PLW1 50.0000000 W  
===== CHANNEL f2 =====  
SFO2 400.1316095 MHz  
NUC2 1H  
CPCPRG2 waltz16  
PCPRD2 90.00 usec  
PLW2 10.3999962 W  
PLW12 0.2888000 W  
PLW13 0.2340000 W  
F2 - Processing parameters  
SI 32768  
SF 100.618136 MHz  
WDW EM  
SSB 0  
LB 1.00 Hz  
GB 0  
PC 1.40

### 3- Biological activity

#### 3.1. *In vitro* Cytotoxicity

Using a Sigma *in vitro* MTT-based assay package, the MTT test was utilized to evaluate the cytotoxic activity of target compounds. Prostate cancer cell lines PC-3 and DU-145 were obtained from the American Type Culture Collection and grown in DMEM media with FBS, penicillin, and streptomycin at 37 °C and 5% CO<sub>2</sub>. Before being trypsinized, plated, and incubated overnight at 37 °C, the cells were washed in PBS. Cells were grown for 48 hours at 37 °C after being treated with varied concentrations of study chemicals. The cells were treated with MTT reagent for 4 hours at 37 °C in the dark. A plate reader was used to quantify absorbance at 590 nm, and cell viability was assessed. IC<sub>50</sub> values were then estimated and the SD was measured after three independent tests.

#### 3.2. Cytotoxicity IC<sub>50</sub> curves

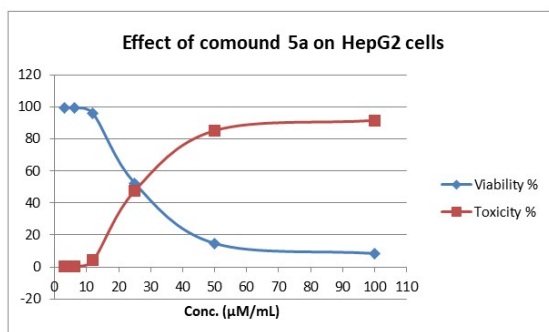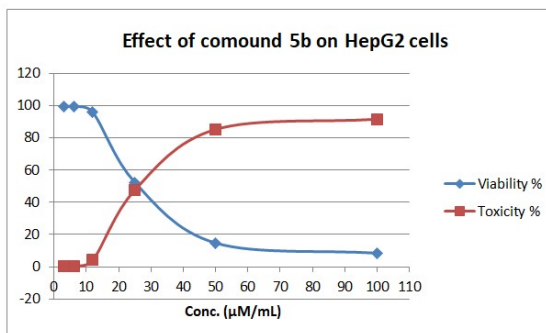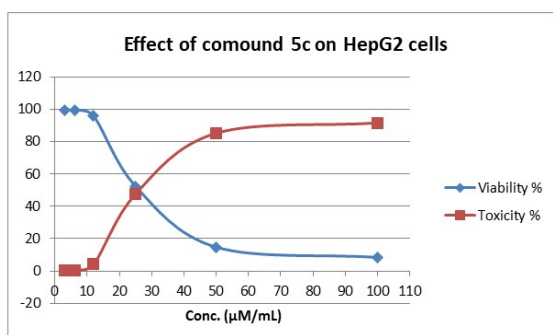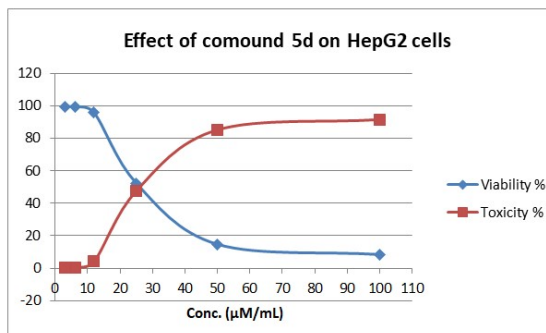

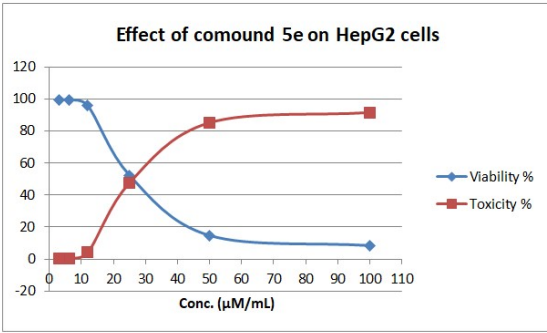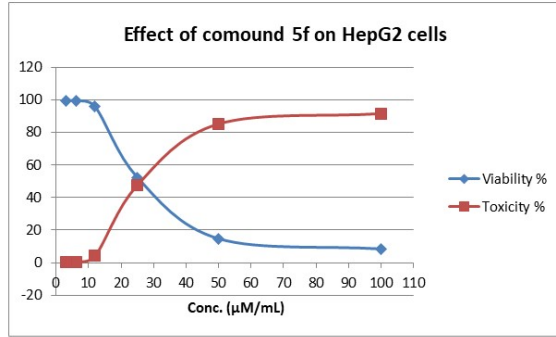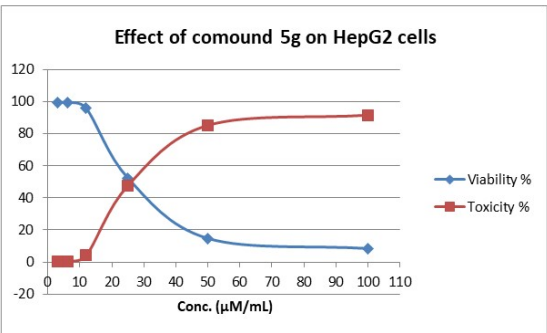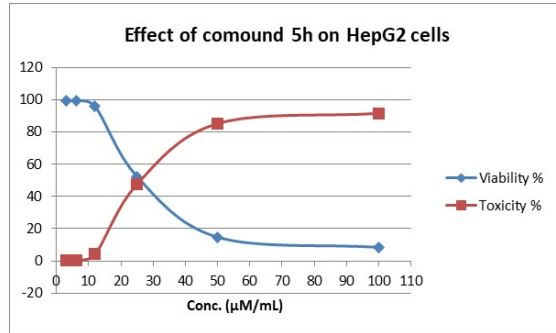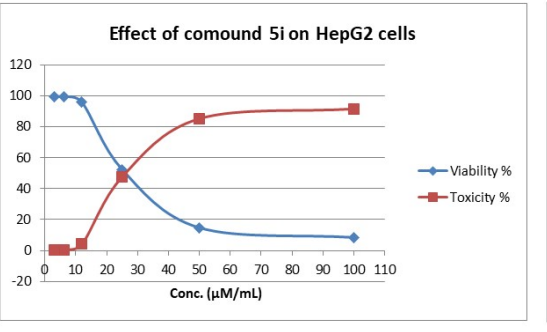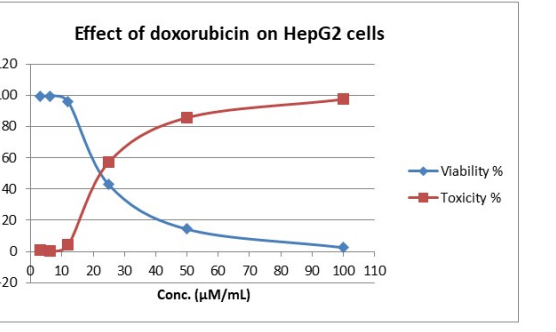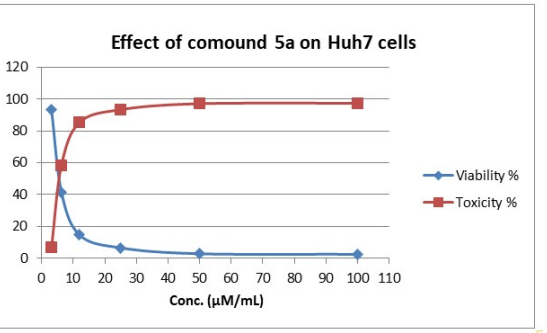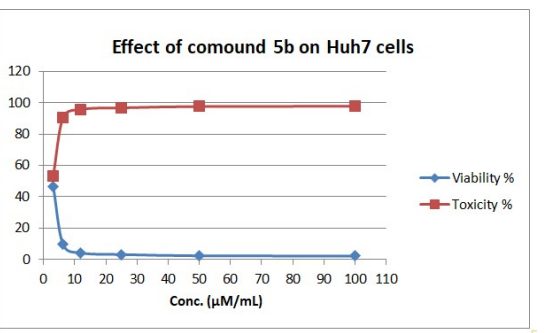

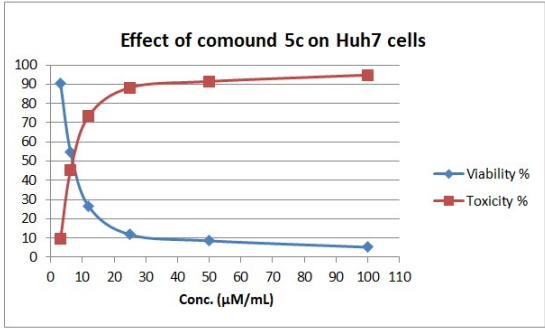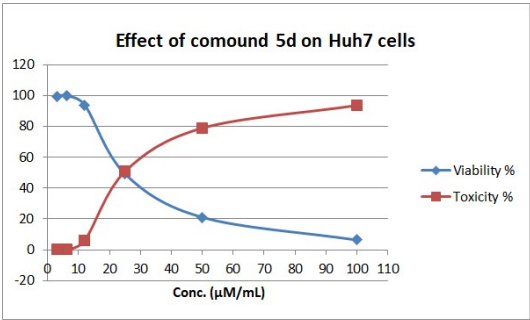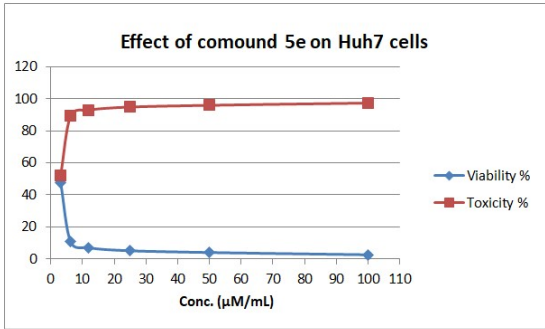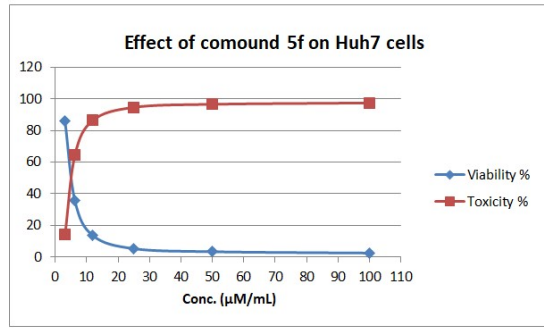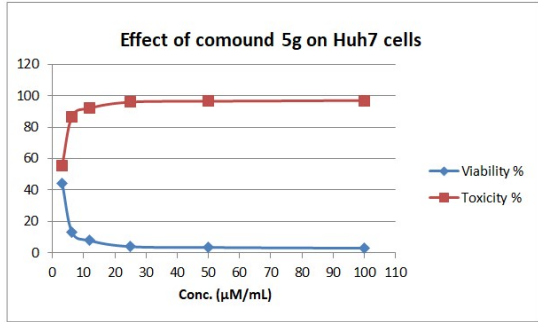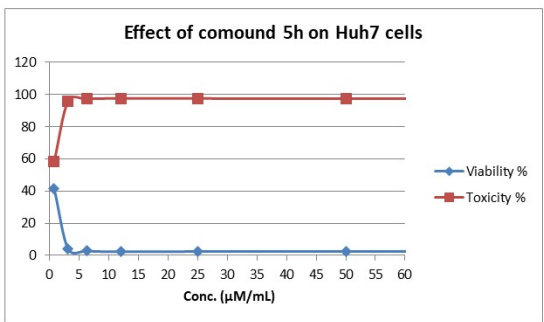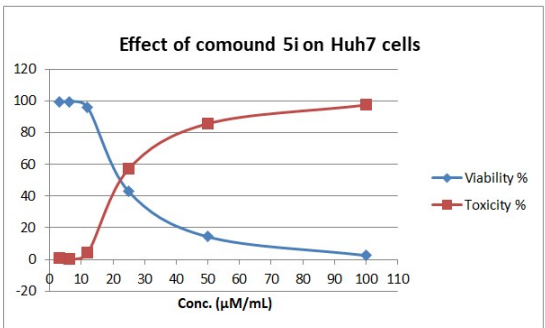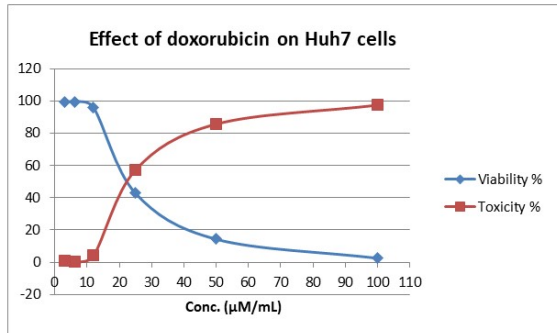

### 3.3. STAT3/5 assay

## 1. STAT3 Assay

### Detailed Results:

| standard | conc % |
|----------|--------|
| st1      | 50     |
| st2      | 25     |
| st3      | 12.5   |
| st4      | 6.25   |
| st5      | 3.13   |
| st6      | 1.56   |
| st7      | 0.78   |

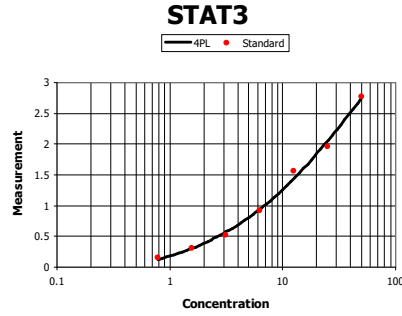

### Plate map:

|   | 1   | 2    | 3  | 4  | 5  | 6  | 7  | 8  | 9  | 10 | 11 | 12 |
|---|-----|------|----|----|----|----|----|----|----|----|----|----|
| A | st1 | 5h   | -- | -- | -- | -- | -- | -- | -- | -- | -- | -- |
| B | st2 | 5h   | -- | -- | -- | -- | -- | -- | -- | -- | -- | -- |
| C | st3 | 5e   | -- | -- | -- | -- | -- | -- | -- | -- | -- | -- |
| D | st4 | 5e   | -- | -- | -- | -- | -- | -- | -- | -- | -- | -- |
| E | st5 | cont | -- | -- | -- | -- | -- | -- | -- | -- | -- | -- |
| F | st6 | cont | -- | -- | -- | -- | -- | -- | -- | -- | -- | -- |
| G | st7 | --   | -- | -- | -- | -- | -- | -- | -- | -- | -- | -- |
| H | B   | --   | -- | -- | -- | -- | -- | -- | -- | -- | -- | -- |

### OD

|   | 1     | 2     | 3 | 4 | 5 | 6 | 7 | 8 | 9 | 10 | 11 | 12 |
|---|-------|-------|---|---|---|---|---|---|---|----|----|----|
| A | 2.795 | 0.608 | 0 | 0 | 0 | 0 | 0 | 0 | 0 | 0  | 0  | 0  |
| B | 1.981 | 0.592 | 0 | 0 | 0 | 0 | 0 | 0 | 0 | 0  | 0  | 0  |
| C | 1.577 | 0.793 | 0 | 0 | 0 | 0 | 0 | 0 | 0 | 0  | 0  | 0  |
| D | 0.941 | 0.828 | 0 | 0 | 0 | 0 | 0 | 0 | 0 | 0  | 0  | 0  |
| E | 0.546 | 1.567 | 0 | 0 | 0 | 0 | 0 | 0 | 0 | 0  | 0  | 0  |
| F | 0.321 | 1.601 | 0 | 0 | 0 | 0 | 0 | 0 | 0 | 0  | 0  | 0  |
| G | 0.169 | 0     | 0 | 0 | 0 | 0 | 0 | 0 | 0 | 0  | 0  | 0  |
| H | 0.022 | 0     | 0 | 0 | 0 | 0 | 0 | 0 | 0 | 0  | 0  | 0  |

| Calibrator | Wells | Conc. | Raw (Corrected) | Backfit | Recovery % |
|------------|-------|-------|-----------------|---------|------------|
| Standard1  | A1    | 50    | 2.77            | 51.23   | 102.5      |
| Standard2  | B1    | 25    | 1.96            | 22.64   | 90.54      |
| Standard3  | C1    | 12.5  | 1.56            | 14.41   | 115.3      |
| Standard4  | D1    | 6.25  | 0.919           | 6.041   | 96.65      |
| Standard5  | E1    | 3.125 | 0.524           | 2.832   | 90.61      |

|           |    |        |       |        |       |
|-----------|----|--------|-------|--------|-------|
| Standard6 | F1 | 1.563  | 0.299 | 1.537  | 98.39 |
| Standard7 | G1 | 0.7813 | 0.147 | 0.8648 | 110.7 |

| Sample | Wells | Raw   | Background Corrected | Conc. | Conc. (Average) | %CV  | SD     | SEM    |
|--------|-------|-------|----------------------|-------|-----------------|------|--------|--------|
| 5h     | A2    | 0.608 | 0.578                | 3.253 | 3.197           | 2.47 | 0.0789 | 0.0558 |
|        | B2    | 0.592 |                      | 3.142 |                 |      |        |        |
| 5e     | C2    | 0.793 | 0.789                | 4.688 | 4.839           | 4.42 | 0.214  | 0.151  |
|        | D2    | 0.828 |                      | 4.991 |                 |      |        |        |
| cont   | E2    | 1.57  | 1.56                 | 14.24 | 14.53           | 2.84 | 0.413  | 0.292  |
|        | F2    | 1.6   |                      | 14.82 |                 |      |        |        |
| Blank  | H1    | 0.022 | 0                    | 0.371 | 0.371           | -    | -      | 0      |

## 2. STAT5 Assay

Detailed results

| STANDARDS | ng/ml |
|-----------|-------|
| St.1      | 25    |
| St.2      | 12.5  |
| St.3      | 6.25  |
| St.4      | 3.12  |
| St.5      | 1.56  |
| St.6      | 0.78  |
| St.7      | 0.39  |

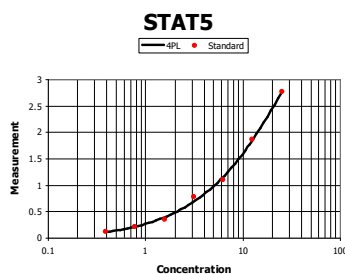

### Plate map

|   | 1    | 2    | 3   | 4  | 5  | 6  | 7  | 8  | 9  | 10 | 11 | 12 |
|---|------|------|-----|----|----|----|----|----|----|----|----|----|
| A | st 1 | 5h   | --- | -- | -- | -- | -- | -- | -- | -- | -- | -- |
| B | st 2 | 5h   | --- | -- | -- | -- | -- | -- | -- | -- | -- | -- |
| C | st 3 | 5e   | --- | -- | -- | -- | -- | -- | -- | -- | -- | -- |
| D | st 4 | 5e   | --- | -- | -- | -- | -- | -- | -- | -- | -- | -- |
| E | st 5 | cont | --- | -- | -- | -- | -- | -- | -- | -- | -- | -- |
| F | st 6 | cont | --- | -- | -- | -- | -- | -- | -- | -- | -- | -- |
| G | st 7 | --   | --- | -- | -- | -- | -- | -- | -- | -- | -- | -- |
| H | B    | --   | --- | -- | -- | -- | -- | -- | -- | -- | -- | -- |

Samples OD results

|  | 1 | 2 | 3 | 4 | 5 | 6 | 7 | 8 | 9 | 10 | 11 | 12 |
|--|---|---|---|---|---|---|---|---|---|----|----|----|
|--|---|---|---|---|---|---|---|---|---|----|----|----|

|   |       |       |   |   |   |   |   |   |   |   |   |   |
|---|-------|-------|---|---|---|---|---|---|---|---|---|---|
| A | 2.792 | 0.566 | 0 | 0 | 0 | 0 | 0 | 0 | 0 | 0 | 0 | 0 |
| B | 1.886 | 0.549 | 0 | 0 | 0 | 0 | 0 | 0 | 0 | 0 | 0 | 0 |
| C | 1.119 | 0.889 | 0 | 0 | 0 | 0 | 0 | 0 | 0 | 0 | 0 | 0 |
| D | 0.791 | 0.951 | 0 | 0 | 0 | 0 | 0 | 0 | 0 | 0 | 0 | 0 |
| E | 0.365 | 1.803 | 0 | 0 | 0 | 0 | 0 | 0 | 0 | 0 | 0 | 0 |
| F | 0.228 | 1.668 | 0 | 0 | 0 | 0 | 0 | 0 | 0 | 0 | 0 | 0 |
| G | 0.147 | 0     | 0 | 0 | 0 | 0 | 0 | 0 | 0 | 0 | 0 | 0 |
| H | 0.018 | 0     | 0 | 0 | 0 | 0 | 0 | 0 | 0 | 0 | 0 | 0 |

| Calibrator | Wells | Conc.  | Raw (Corrected) | Backfit | Recovery % |
|------------|-------|--------|-----------------|---------|------------|
| Standard1  | A1    | 25     | 2.77            | 24.96   | 99.83      |
| Standard2  | B1    | 12.5   | 1.87            | 12.7    | 101.6      |
| Standard3  | C1    | 6.25   | 1.1             | 5.832   | 93.31      |
| Standard4  | D1    | 3.125  | 0.773           | 3.624   | 116        |
| Standard5  | E1    | 1.563  | 0.347           | 1.335   | 85.45      |
| Standard6  | F1    | 0.7813 | 0.21            | 0.7469  | 95.6       |
| Standard7  | G1    | 0.3906 | 0.129           | 0.4405  | 112.8      |

| Sample | Wells | Raw   | Background Corrected | Conc.   | Conc. (Average) | %CV  | SD     | SEM    |
|--------|-------|-------|----------------------|---------|-----------------|------|--------|--------|
| 5h     | A2    | 0.566 | 0.54                 | 2.333   | 2.288           | 2.79 | 0.0638 | 0.0451 |
|        | B2    | 0.549 |                      | 2.243   |                 |      |        |        |
| 5e     | C2    | 0.889 | 0.902                | 4.242   | 4.447           | 6.51 | 0.289  | 0.205  |
|        | D2    | 0.951 |                      | 4.652   |                 |      |        |        |
| cont   | E2    | 1.8   | 1.72                 | 11.82   | 11.15           | 8.55 | 0.953  | 0.674  |
|        | F2    | 1.67  |                      | 10.48   |                 |      |        |        |
| Blank  | H1    | 0.018 | 0                    | 0.04569 | 0.04569         | -    | -      | 0      |



**3.4. Western blot analysis**

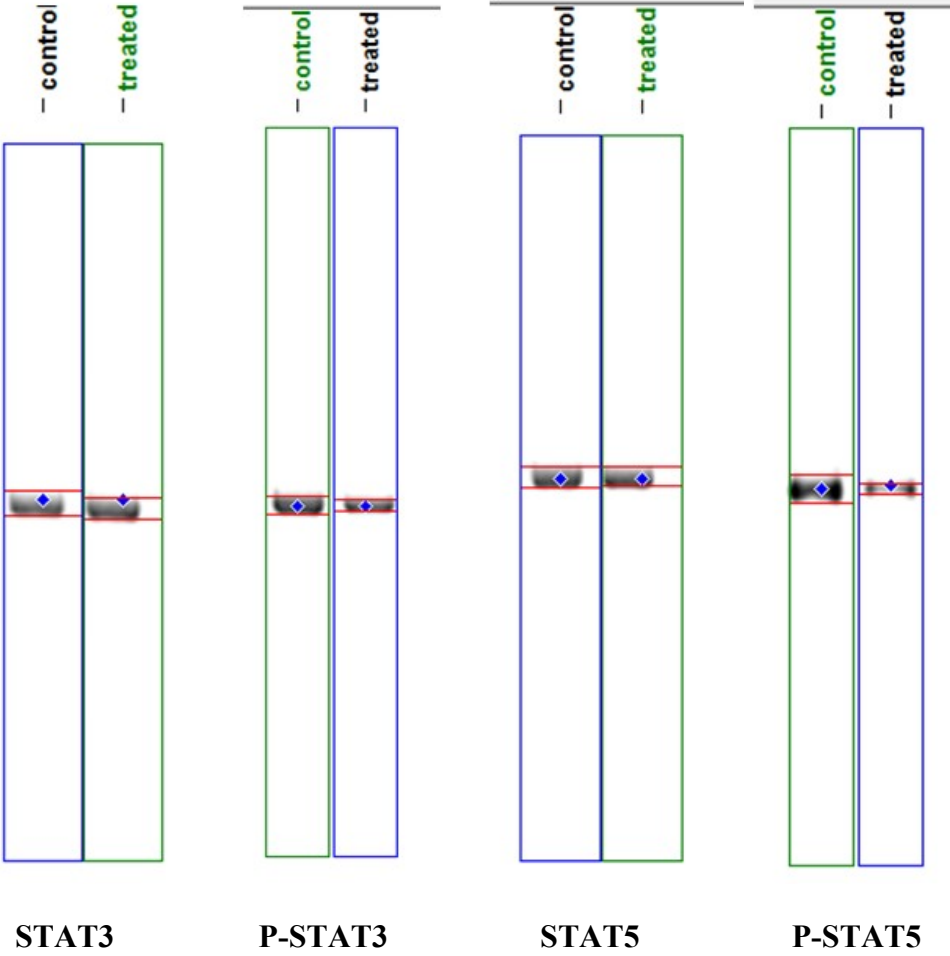

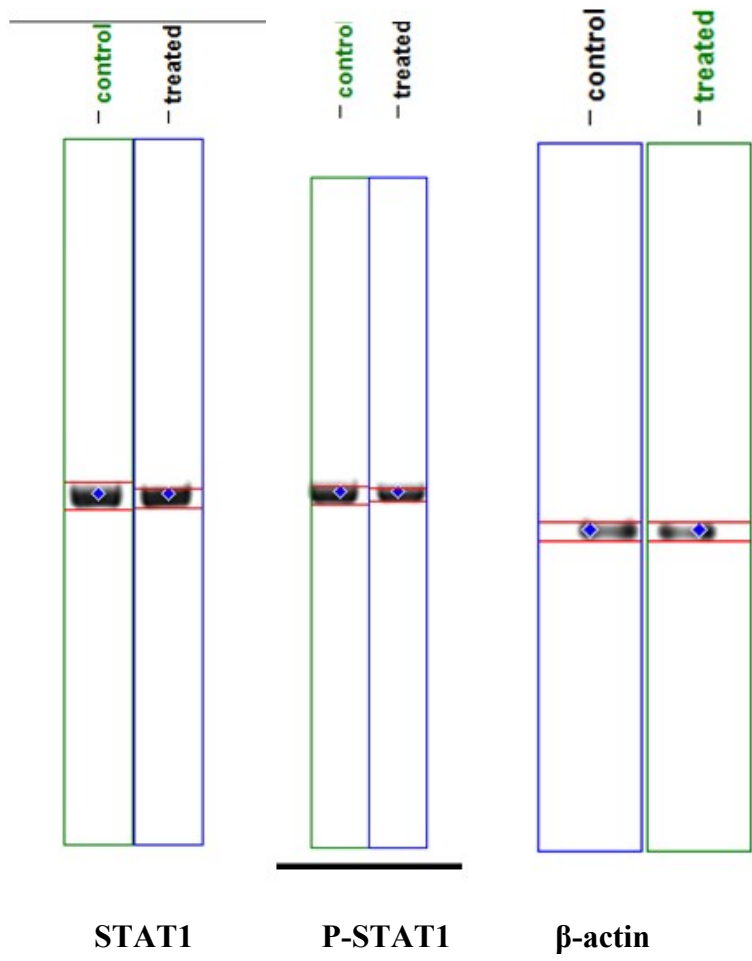

#### 4. Docking Study

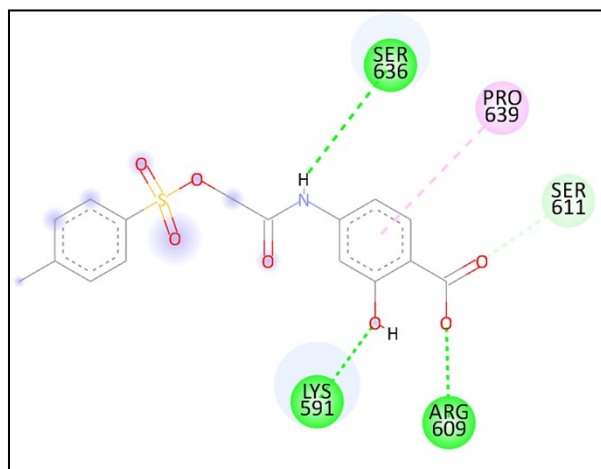

Binding poses of **S3I-201** inside STAT3 active site.

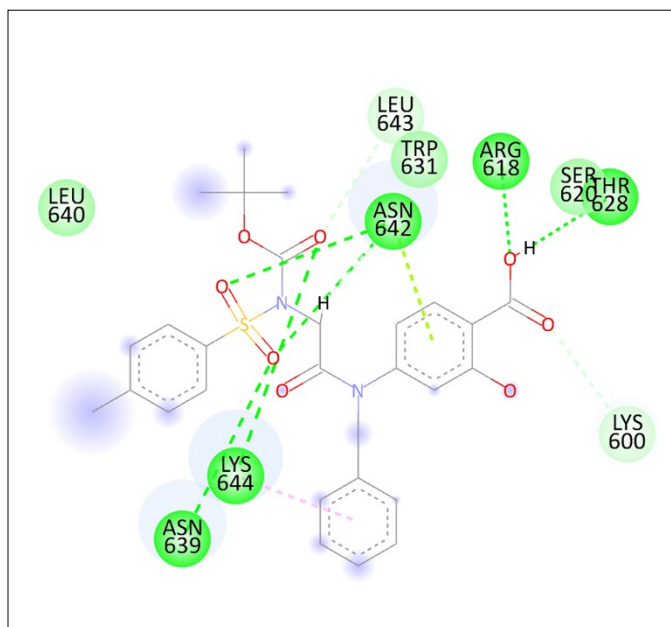

Binding pose of **SF-1-088** inside STAT5 active site
